# Supplementary material for: Validated thin-layer chromatographic method for alternative and simultaneous determination of two anti-gout agents in their fixed dose combinations
Source: publisher site journal article supplement (doi:10.1515/chem-2018-0050), 2018-05-23
Supplement: Supplementary file 1 [file chem-2018-0050_sm.pdf]

## Supplementary Information

## Open Access

Abdel-Maaboud I. Mohamed, Mahmoud A. Omar, Sayed M. Derayea, Mohamed A. Hammad\*, Abobakr A. Mohamed

## Validated thin-layer chromatographic method for alternative and simultaneous determination of two anti-gout agents in their fixed dose combinations

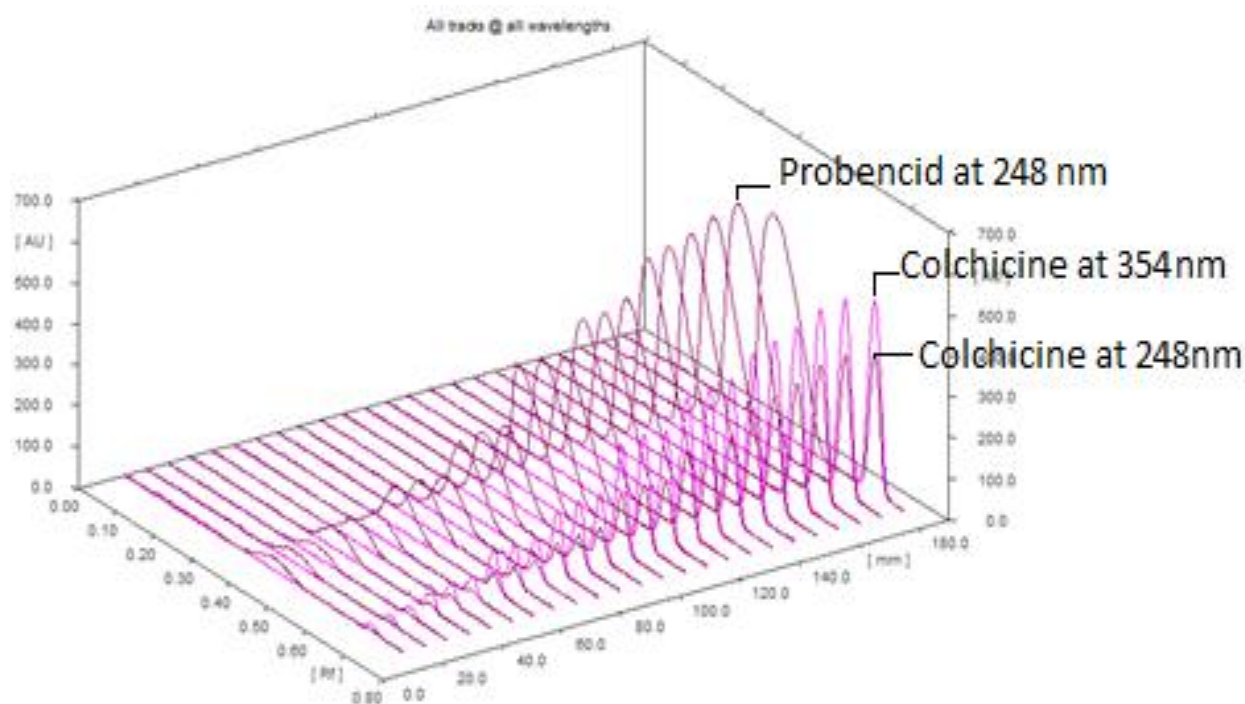

**Figure 1S:** Three-dimensional chromatograms (All tracks at all wavelengths) for calibrations of colchicine and probencid mixture ranging from 16 to 400 ng/band and from 120 to 6000 ng/band for colchicine and probencid, respectively, at 248 nm, and ranging from 8 to 400 ng/band for colchicine at 354 nm.

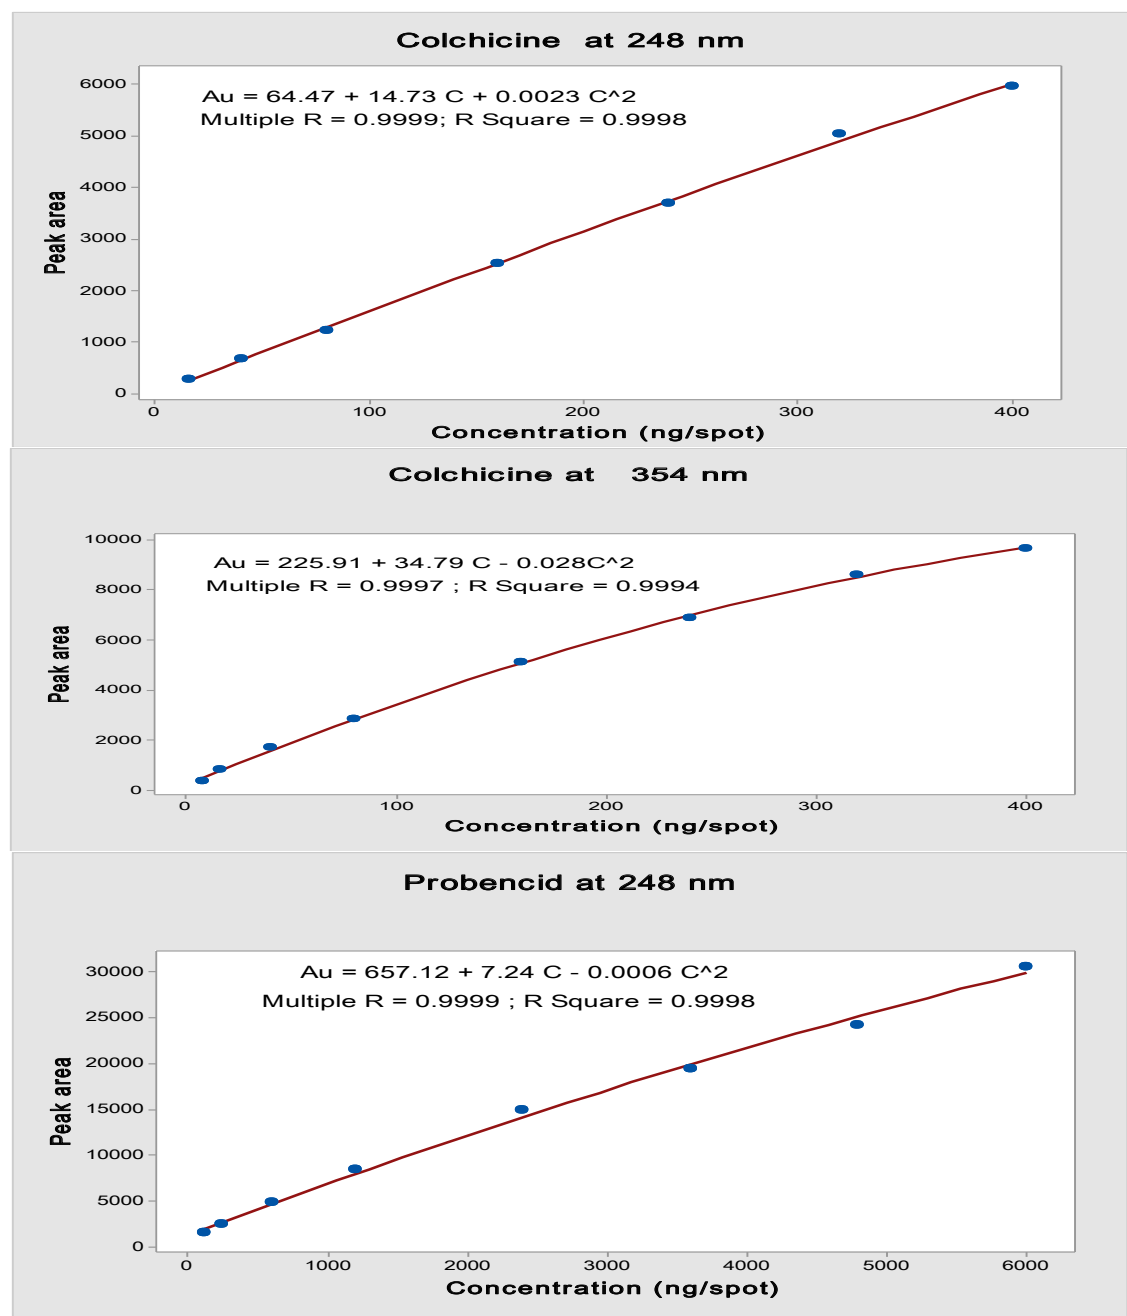

Figure 25: Calibration curves for the determination of colchicine and probencid using the second-order polynomial fit.

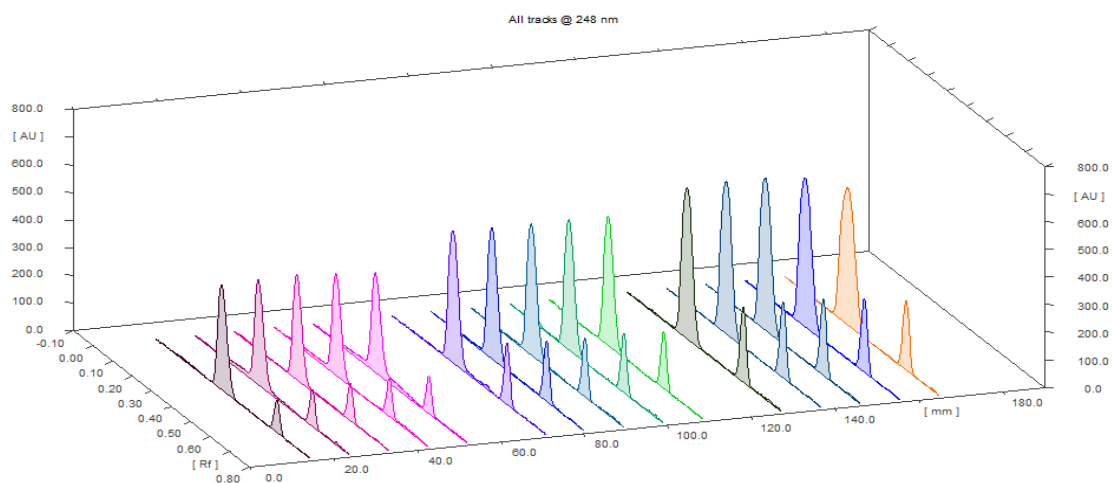

**Figure 35:** Three-dimensional TLC-densitogram assesses the precision of colchicine and probencid binary mixture at three concentration levels 80, 160 and 240 ng/band for colchicine and 1200, 2400 and 3600 ng/band for probencid at 248 nm.

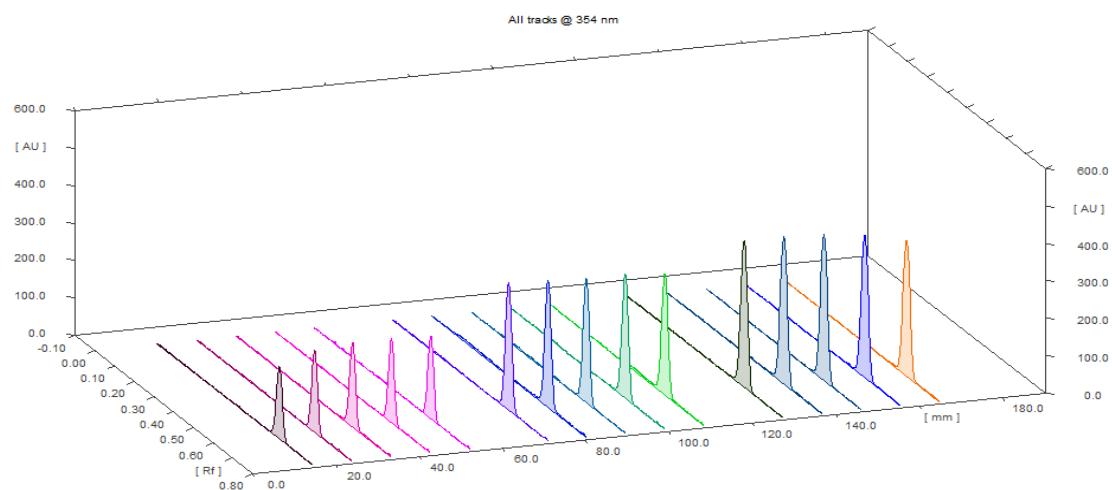

**Figure 45:** Three-dimensional TLC-densitogram assesses the precision of colchicine and probencid binary mixture at three concentration levels 80, 160 and 240 ng/band for colchicine and 1200, 2400 and 3600 ng/band for probencid, at 354 nm, where tracks of probencid not appear at this wavelength.

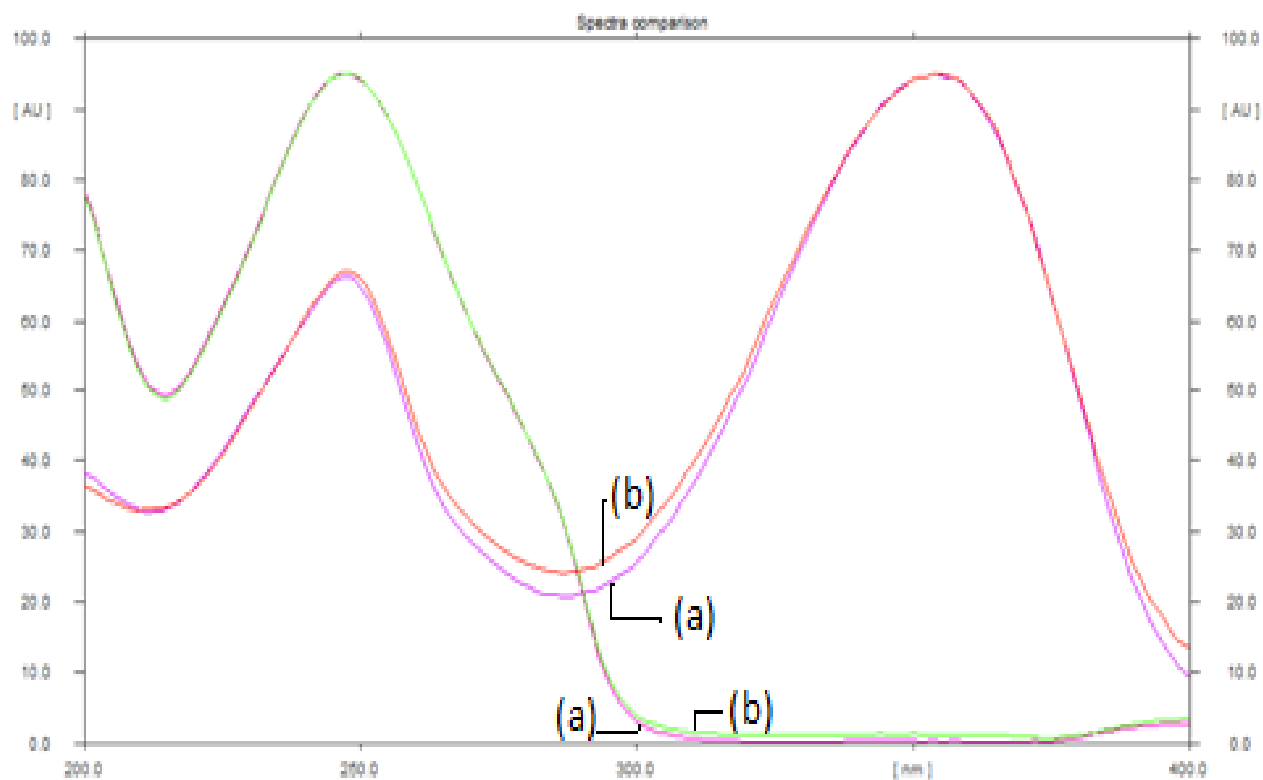

**Figure 5S:** Overlaid UV absorption spectra of colchicine (40 ng/band) and probenecid (4000 ng/band), where; (a) standard solutions and (b) dosage form extract (Gouty less® tablets).
